# Supplementary material for: beRBP: binding estimation for human RNA-binding proteins
Source: PubMed Central journal article supplement (PMC6411931; doi:10.1093/nar/gky1294), 2018-12-27
Supplement: gky1294_supplemental_files.pdf [file gky1294_supplemental_files.pdf]

# beRBP: Binding Estimation for human RNA-Binding Proteins

Hui Yu<sup>1§</sup>, Jing Wang<sup>1,2§</sup>, Quanhu Sheng<sup>1</sup>, Qi Liu<sup>1,2\*</sup>, and Yu Shyr<sup>1,2\*</sup>

<sup>1</sup>Center for Quantitative Sciences, Vanderbilt University Medical Center, Nashville, TN 37232, USA.

<sup>2</sup>Department of Biostatistics, Vanderbilt University Medical Center, Nashville, TN 37232, USA.

Table S1. 37 beRBP-specific models.

| RBP model <sup>⊗</sup> | Motif ID <sup>§</sup>  | # targets | # pos_seqs | # neg_seqs | AUC  | AUPRC |
|------------------------|------------------------|-----------|------------|------------|------|-------|
| CIRBP                  | M048_0.6               | 64        | 61         | 2565       | 0.87 | 0.66  |
| CPEB4                  | M149_0.6               | 247       | 237        | 2558       | 0.88 | 0.80  |
| ELAVL1_1               | M031_0.6               | 7775*     | 7409       | 2202       | 0.65 | 0.81  |
| ELAVL1_2               | M108_0.6               | 7775*     | 7409       | 2202       | 0.65 | 0.81  |
| ELAVL1_3               | M112_0.6               | 7775*     | 7409       | 2202       | 0.65 | 0.81  |
| ELAVL1_4               | M127_0.6               | 7775*     | 7409       | 2202       | 0.65 | 0.81  |
| ELAVL1_5               | M232_0.6               | 7775*     | 7409       | 2202       | 0.65 | 0.81  |
| FUS                    | M316_0.6               | 2615*     | 2494       | 2447       | 0.70 | 0.64  |
| <b>FXR1</b>            | M152_0.6               | 2900      | 2770       | 2438       | 0.96 | 0.97  |
| FXR2                   | M020_0.6               | 3250*     | 3096       | 2414       | 0.68 | 0.67  |
| <b>HNRNPA1</b>         | M022_0.6               | 463       | 449        | 2554       | 0.95 | 0.89  |
| <b>HNRNPA2B1</b>       | M024_0.6               | 1775      | 1690       | 2483       | 0.94 | 0.94  |
| <b>HNRNPC</b>          | M025_0.6               | 4037      | 3856       | 2387       | 0.97 | 0.98  |
| <b>HNRNPF</b>          | M151_0.6               | 3655      | 3504       | 2417       | 0.94 | 0.97  |
| IGF2BP1                | M296_0.6               | 6538*     | 6258       | 2288       | 0.61 | 0.76  |
| IGF2BP2                | M032_0.6               | 6776*     | 6477       | 2269       | 0.80 | 0.93  |
| IGF2BP3                | M163_0.6               | 7953*     | 7611       | 2226       | 0.80 | 0.93  |
| KHDRBS1                | M160_0.6               | 117       | 111        | 2562       | 0.88 | 0.79  |
| LIN28A_1               | M035_0.6               | 4104*     | 3925       | 2389       | 0.65 | 0.68  |
| LIN28A_2               | M153_0.6               | 4104*     | 3925       | 2389       | 0.63 | 0.68  |
| LIN28B                 | M035_0.6               | 4743*     | 4536       | 2361       | 0.66 | 0.73  |
| MSI1_1                 | M040_0.6               | 3462*     | 3302       | 2408       | 0.69 | 0.69  |
| MSI1_2                 | M167_0.6               | 3462*     | 3302       | 2408       | 0.69 | 0.69  |
| NCL                    | M245_0.6               | 97        | 96         | 2567       | 0.86 | 0.70  |
| <b>PABPC1</b>          | M146_0.6               | 1035      | 997        | 2530       | 0.89 | 0.87  |
| <b>PCBP2</b>           | M043_0.6               | 3130      | 2995       | 2433       | 0.95 | 0.97  |
| PUM2                   | Incarnato et al., 2013 | 3286      | 3143       | 2425       | 0.80 | 0.77  |
| QKI                    | M046_0.6               | 841       | 803        | 2530       | 0.79 | 0.51  |
| <b>RBFOX2</b>          | M159_0.6               | 643       | 611        | 2536       | 0.96 | 0.92  |
| RBM47                  | M234_0.6               | 6116*     | 5842       | 2294       | 0.69 | 0.79  |
| <b>TAF15</b>           | M316_0.6               | 3765      | 3611       | 2414       | 0.92 | 0.95  |
| <b>TARDBP</b>          | M074_0.6               | 1144      | 1090       | 2514       | 0.95 | 0.94  |
| TIA1_1                 | M075_0.6               | 6386*     | 6077       | 2259       | 0.64 | 0.77  |
| TIA1_2                 | M156_0.6               | 6386*     | 6077       | 2259       | 0.64 | 0.77  |
| <b>U2AF2</b>           | M077_0.6               | 1068      | 1013       | 2513       | 0.92 | 0.90  |
| <b>ZFP36_1</b>         | M269_0.6               | 4053      | 3889       | 2404       | 0.94 | 0.97  |
| <b>ZFP36_2</b>         | M350_0.6               | 4053      | 3889       | 2404       | 0.96 | 0.98  |

Bold and highlighted ones are 13 RBP models of the highest performance (AUC  $\geq$  0.85 and AUPRC  $\geq$  0.85). \*target sequences underwent clustering and representative sequence selection. RNA motifs were obtained from cisBP-RNA except PUM2, for which the RNA motif was obtained from supplementary Table S2 of Incarnato et al., 2013 (PubMed ID: 23863844).

The positive, negative training set, and PWM for each RBP could be downloaded from <http://bioinfo.vanderbilt.edu/beRBP/download/TabS1.7z>.

**Table S2. Whole-transcriptome target scan by beRBP.**

| RBP     | eCLIP cell line | # eCLIP targets | # beRBP targets | # inter-section targets | PV <sup>§</sup> | Sensitivity | Specificity | Precision |
|---------|-----------------|-----------------|-----------------|-------------------------|-----------------|-------------|-------------|-----------|
| FMR1*   | K562            | 7,809           | 23,278          | 4,651                   | 1.80E-259       | 0.6         | 0.61        | 0.2       |
| FXR1    | K562            | 8,894           | 4,503           | 1,434                   | 2.50E-171       | 0.16        | 0.94        | 0.32      |
| FXR2    | K562            | 7,049           | 23,942          | 4,371                   | 1.60E-263       | 0.62        | 0.6         | 0.18      |
| HNRNPA1 | K562            | 5,915           | 1,532           | 511                     | 4.60E-132       | 0.09        | 0.98        | 0.33      |
| HNRNPC  | HepG2           | 8,676           | 4,739           | 1,942                   | <2.2E-16        | 0.22        | 0.94        | 0.41      |
| IGF2BP1 | K562            | 19,318          | 27,631          | 13,604                  | <2.2E-16        | 0.7         | 0.62        | 0.49      |
| IGF2BP2 | K562            | 18,058          | 17,962          | 8,587                   | <2.2E-16        | 0.48        | 0.75        | 0.48      |
| IGF2BP3 | HepG2           | 17,707          | 14,691          | 7,208                   | <2.2E-16        | 0.41        | 0.8         | 0.49      |
| KHDRBS1 | K562            | 10,163          | 89              | 23                      | 0.072           | 0           | 1           | 0.26      |
| LIN28B  | K562            | 15,671          | 25,964          | 10,301                  | <2.2E-16        | 0.66        | 0.61        | 0.4       |
| NONO*   | K562            | 9,842           | 29,153          | 6,608                   | 1.5E-241        | 0.67        | 0.51        | 0.23      |
| PCBP2   | HepG2           | 11,251          | 2,918           | 2,319                   | <2.2E-16        | 0.21        | 0.99        | 0.8       |
| PTBP1*  | K562            | 7,596           | 25,438          | 4,639                   | 5.1E-189        | 0.61        | 0.57        | 0.18      |
| PUM2    | K562            | 15,063          | 19,449          | 9,075                   | <2.2E-16        | 0.6         | 0.75        | 0.47      |
| RBM5*   | HepG2           | 11,392          | 24,290          | 7,321                   | <1E-8           | 0.64        | 0.62        | 0.30      |
| QKI     | K562            | 4,664           | 13,546          | 2,388                   | <2.2E-16        | 0.51        | 0.78        | 0.18      |
| RBFOX2  | HepG2           | 6,695           | 4,134           | 1,145                   | 3.10E-181       | 0.17        | 0.94        | 0.28      |
| SF3B4*  | K562            | 4,327           | 24,498          | 2,845                   | 1.20E-169       | 0.66        | 0.56        | 0.12      |
| SFPQ*   | HepG2           | 2,063           | 22,515          | 1,288                   | 7.80E-95        | 0.62        | 0.61        | 0.06      |
| SRSF1*  | K562            | 10,288          | 22,807          | 6,301                   | <1E-8           | 0.61        | 0.64        | 0.28      |
| SRSF7*  | K562            | 5,465           | 22,018          | 3,532                   | <2.2E-16        | 0.65        | 0.63        | 0.16      |
| SRSF9*  | HepG2           | 8,536           | 22,921          | 5,424                   | <1E-8           | 0.64        | 0.63        | 0.24      |
| TAF15   | K562            | 5,350           | 4,988           | 1,295                   | 6.00E-278       | 0.24        | 0.93        | 0.26      |
| TARDBP  | K562            | 7,242           | 1,173           | 745                     | <2.2E-16        | 0.1         | 0.99        | 0.64      |
| TIA1    | K562            | 24,438          | 26,633          | 1,5169                  | <1E-8           | 0.62        | 0.64        | 0.57      |
| U2AF2   | K562            | 8,718           | 875             | 303                     | 2.00E-44        | 0.04        | 0.99        | 0.35      |

\*these RBPs do not have established beRBP specific models and their targets were predicted by the General model.

<sup>§</sup> one-sided Fisher's exact test P-value for overlap between beRBP targets and eCLIP targets, as calculated in the RBPmap study (PMID: 24829458) .

**Note:** Targets of 17 RBPs were predicted by beRBP-Specific models (beRBP-General model results could be downloaded from [http://bioinfo.vanderbilt.edu/beRBP/download/beRBP-G\\_targets\\_26RBPs.7z](http://bioinfo.vanderbilt.edu/beRBP/download/beRBP-G_targets_26RBPs.7z) ), whereas targets of nine RBPs (asterisk) were predicted by beRBP-General model. Totally 55,935 3'-UTRs were scanned. beRBP predictions were dichotomized by the model-specific threshold optimized in the model training process. The positive predictions concurrent with eCLIP peaks were considered as true positives, otherwise regarded as false positives. The negative predictions void of eCLIP peaks were treated as true negatives, otherwise counted as false negatives.

The 55,935 3'-UTRs, eCLIP peaks, PWM for each RBP, the threshold for each specific-model and the threshold for the General model could be downloaded from <http://bioinfo.vanderbilt.edu/beRBP/download/TabS2-4.7z>

Table S3. Whole-transcriptome scan performance metrics for 17 RBPs by beRBP-Specific, beRBP-General, RBPmap, and DeepBind models.

| RBP     | AUC (on whole eCLIP data) |         |        |          | AUC (on AURA-excluded eCLIP data) |         |        |          | AUPRC (on whole eCLIP data) |         |        |          | AUPRC (on AURA-excluded eCLIP data) |         |        |          |
|---------|---------------------------|---------|--------|----------|-----------------------------------|---------|--------|----------|-----------------------------|---------|--------|----------|-------------------------------------|---------|--------|----------|
|         | beRBP-S                   | beRBP-G | RBPmap | DeepBind | beRBP-S                           | beRBP-G | RBPmap | DeepBind | beRBP-S                     | beRBP-G | RBPmap | DeepBind | beRBP-S                             | beRBP-G | RBPmap | DeepBind |
| FXR1    | 0.6                       | 0.63    | 0.54   | 0.61     | 0.57                              | 0.6     | 0.53   | 0.6      | 0.23                        | 0.24    | 0.16   | 0.18     | 0.17                                | 0.18    | 0.14   | 0.16     |
| FXR2    | 0.66                      | 0.68    | 0.61   | 0.62     | 0.63                              | 0.65    | 0.6    | 0.61     | 0.23                        | 0.26    | 0.17   | 0.15     | 0.18                                | 0.19    | 0.15   | 0.13     |
| HNRNPA1 | 0.67                      | 0.69    | 0.67   | 0.69     | 0.66                              | 0.68    | 0.66   | 0.69     | 0.20                        | 0.21    | 0.17   | 0.17     | 0.17                                | 0.18    | 0.16   | 0.16     |
| HNRNPC  | 0.71                      | 0.69    | 0.63   | 0.73     | 0.67                              | 0.66    | 0.6    | 0.71     | 0.30                        | 0.27    | 0.22   | 0.27     | 0.21                                | 0.20    | 0.17   | 0.21     |
| IGF2BP1 | 0.72                      | 0.72    | NA     | NA       | 0.69                              | 0.69    | NA     | NA       | 0.59                        | 0.57    | NA     | NA       | 0.52                                | 0.48    | NA     | NA       |
| IGF2BP2 | 0.65                      | 0.66    | 0.58   | 0.59     | 0.63                              | 0.63    | 0.58   | 0.58     | 0.48                        | 0.47    | 0.35   | 0.34     | 0.42                                | 0.40    | 0.30   | 0.29     |
| IGF2BP3 | 0.65                      | 0.67    | 0.6    | 0.62     | 0.63                              | 0.64    | 0.59   | 0.61     | 0.47                        | 0.47    | 0.35   | 0.34     | 0.42                                | 0.41    | 0.30   | 0.29     |
| KHDRBS1 | 0.55                      | 0.64    | 0.61   | 0.64     | 0.55                              | 0.64    | 0.61   | 0.64     | 0.21                        | 0.25    | 0.22   | 0.22     | 0.20                                | 0.25    | 0.22   | 0.22     |
| LIN28B  | 0.69                      | 0.68    | 0.59   | NA       | 0.66                              | 0.64    | 0.58   | NA       | 0.48                        | 0.47    | 0.32   | NA       | 0.41                                | 0.39    | 0.28   | NA       |
| PCBP2   | 0.76                      | 0.77    | 0.76   | 0.65     | 0.7                               | 0.71    | 0.75   | 0.64     | 0.51                        | 0.53    | 0.40   | 0.26     | 0.31                                | 0.32    | 0.33   | 0.21     |
| PUM2    | 0.74                      | 0.75    | 0.64   | NA       | 0.72                              | 0.73    | 0.63   | NA       | 0.53                        | 0.51    | 0.33   | NA       | 0.47                                | 0.45    | 0.29   | NA       |
| QKI     | 0.71                      | 0.72    | 0.64   | 0.66     | 0.7                               | 0.71    | 0.63   | 0.65     | 0.21                        | 0.21    | 0.13   | 0.12     | 0.18                                | 0.18    | 0.11   | 0.11     |
| RBFOX2  | 0.68                      | 0.65    | 0.65   | NA       | 0.67                              | 0.64    | 0.64   | NA       | 0.22                        | 0.21    | 0.18   | NA       | 0.20                                | 0.18    | 0.17   | NA       |
| TAF15   | 0.65                      | 0.68    | 0.6    | NA       | 0.6                               | 0.63    | 0.6    | NA       | 0.17                        | 0.20    | 0.13   | NA       | 0.11                                | 0.13    | 0.11   | NA       |
| TARDBP  | 0.71                      | 0.71    | 0.65   | 0.71     | 0.68                              | 0.68    | 0.64   | 0.7      | 0.31                        | 0.30    | 0.19   | 0.23     | 0.22                                | 0.21    | 0.17   | 0.19     |
| TIA1    | 0.681                     | 0.690   | 0.683  | 0.680    | 0.655                             | 0.667   | 0.672  | 0.676    | 0.62                        | 0.62    | 0.54   | 0.52     | 0.56                                | 0.56    | 0.40   | 0.48     |
| U2AF2   | 0.62                      | 0.64    | 0.57   | 0.66     | 0.62                              | 0.63    | 0.57   | 0.66     | 0.23                        | 0.23    | 0.19   | 0.22     | 0.21                                | 0.22    | 0.18   | 0.21     |

**Note:** All 55,935 3'-UTR sequences were scanned by each method. The positive predictions concurrent with eCLIP peaks were considered as true positives, otherwise regarded as false positives. The negative predictions void of eCLIP peaks were treated as true negatives, otherwise counted as false negatives. Since each RBP-specific eCLIP dataset contains a portion of 3'-UTRs ascertained by the AURA dataset, which contributed in the training of the beRBP-Specific model, we also examined against AURA-excluded eCLIP datasets to ensure a most fair comparison between beRBP models and the competitor methods.

Table S4. Whole-transcriptome scan performance metrics for nine RBPs by beRBP-General, RBPmap, and DeepBind models.

| RBP   | AUC (on whole eCLIP data) |        |          | AUPRC (on whole eCLIP data) |        |          |
|-------|---------------------------|--------|----------|-----------------------------|--------|----------|
|       | beRBP-G                   | RBPmap | DeepBind | beRBP-G                     | RBPmap | DeepBind |
| FMR1  | 0.65                      | 0.60   | 0.62     | 0.21                        | 0.17   | 0.17     |
| NONO  | 0.62                      | 0.63   | NA       | 0.24                        | 0.24   | NA       |
| PTBP1 | 0.63                      | 0.63   | 0.64     | 0.19                        | 0.19   | 0.17     |
| RBM5  | 0.68                      | 0.64   | 0.68     | 0.33                        | 0.27   | 0.27     |
| SF3B4 | 0.64                      | 0.54   | NA       | 0.13                        | 0.08   | NA       |
| SFPQ  | 0.66                      | 0.61   | 0.63     | 0.07                        | 0.05   | 0.05     |
| SRSF1 | 0.68                      | 0.63   | 0.66     | 0.32                        | 0.26   | 0.25     |
| SRSF7 | 0.69                      | 0.62   | 0.67     | 0.21                        | 0.18   | 0.16     |
| SRSF9 | 0.68                      | 0.65   | 0.71     | 0.26                        | 0.23   | 0.24     |

**Note:** These 9 RBPs do not have established beRBP specific models, and therefore their targets were predicted only by the beRBP-General model.

Table S5. Wilcoxon signed rank test comparing AUCs and AUPRCs of four methods across 17 RBPs.

|                             | AUC             |                        |         | AUPRC           |                        |         |
|-----------------------------|-----------------|------------------------|---------|-----------------|------------------------|---------|
|                             | median of beRBP | median of other method | p-value | median of beRBP | median of other method | p-value |
| beRBP Specific vs. RBPmap   | 0.656           | 0.607                  | 0.019   | 0.211           | 0.176                  | 0.0004  |
| beRBP Specific vs. DeepBind | 0.656           | 0.643                  | 0.689   | 0.211           | 0.209                  | 0.008   |
| beRBP General vs. RBPmap    | 0.649           | 0.607                  | 0.001   | 0.215           | 0.176                  | 0.0001  |
| beRBP General vs. DeepBind  | 0.649           | 0.643                  | 0.259   | 0.215           | 0.209                  | 0.0021  |

**Note:** Result here was based on AUCs and AUPRCs calculated for AURA-excluded eCLIP data (see Table S3A).

Table S6. RBP binding prediction on non-constrained RNA segments from doRiNA.

| RBP     | Reference                                             | Median peak length (positive set) | # Positive sequences | # Negative sequences | AUC                 |                     |                     |        |
|---------|-------------------------------------------------------|-----------------------------------|----------------------|----------------------|---------------------|---------------------|---------------------|--------|
|         |                                                       |                                   |                      |                      | beRBP Specific      | beRBP General       | DeepBind            | RBPmap |
| ELAVL1  | Kishore et al. 2011 (doi:10.1038/nmeth.1608)          | 9,831                             | 499                  | 811                  | 0.966               | <b><u>0.989</u></b> | 0.967               | 0.955  |
| FMR1*   | Ascano et al., 2012 (DOI: 10.1038/nature11737)        | 4,922                             | 401                  | 711                  | NA*                 | <b><u>0.911</u></b> | 0.775               | 0.907  |
| FXR1    | Ascano et al. 2012 (DOI: 10.1038/nature11737)         | 10,164                            | 237                  | 420                  | 0.951               | <b><u>0.953</u></b> | 0.878               | 0.741  |
| FXR2    | Ascano et al. 2012 (DOI: 10.1038/nature11737)         | 10,411                            | 296                  | 491                  | <b><u>0.987</u></b> | <b><u>0.987</u></b> | 0.929               | 0.823  |
| FUS     | Hoell et al. 2011 (DOI: 10.1038/nsmb.2163)            | 10,809                            | 185                  | 325                  | <b><u>0.968</u></b> | 0.952               | 0.931               | 0.927  |
| HNRNPC  | Koenig et al. 2010 (DOI: 10.1038/nsmb.1838)           | 9,806                             | 298                  | 490                  | 0.97                | <b><u>0.979</u></b> | 0.944               | 0.912  |
| HNRNPL* | Shankarling et al., 2014 (DOI: 10.1128/MCB.00740-13)  | 12,035                            | 197                  | 349                  | NA*                 | <b><u>0.995</u></b> | 0.929               | 0.908  |
| IGF2BP2 | Hafner et al. 2010 (DOI: 10.1016/j.cell.2010.03.009)  | 10,348                            | 1,355                | 2,208                | <b><u>0.979</u></b> | 0.725               | 0.926               | 0.86   |
| IGF2BP3 | Hafner et al. 2010 (DOI: 10.1016/j.cell.2010.03.009)  | 11,125                            | 374                  | 602                  | 0.973               | <b><u>0.994</u></b> | 0.931               | 0.879  |
| LIN28A  | Hafner et al. 2013 (DOI: 10.1261/rna.036491.112)      | 9,086                             | 363                  | 594                  | 0.98                | <b><u>0.993</u></b> | 0.929               | 0.88   |
| QKI     | Hafner et al., 2010 (DOI: 10.1016/j.cell.2010.03.009) | 301                               | 1,000                | 2,000                | 0.725               | <b><u>0.726</u></b> | 0.597               | 0.68   |
| SRSF1*  | Sanford et al., 2009 (DOI: 10.1101/gr.082503.108)     | 8,450                             | 103                  | 188                  | NA*                 | <b><u>0.997</u></b> | 0.939               | 0.93   |
| TARDBP  | Tollervey et al., 2011 (DOI: 10.1038/nn.2778)         | 301                               | 4,755                | 5,000                | 0.614               | 0.599               | <b><u>0.648</u></b> | 0.566  |
| TIA1    | Wang et al., 2010 (DOI: 10.1371/journal.pbio.1000530) | 9,303                             | 428                  | 693                  | 0.948               | <b><u>0.981</u></b> | 0.928               | 0.912  |

\*No beRBP Specific models are available for FMR1, HNRNPL, and SRSF1.

The positive, negative training set, and PWM for each RBP could be downloaded from <http://bioinfo.vanderbilt.edu/beRBP/download/TabS6.7z>.

Figure S1. ROC curves of beRBP performance by choosing different number of best matching sites.

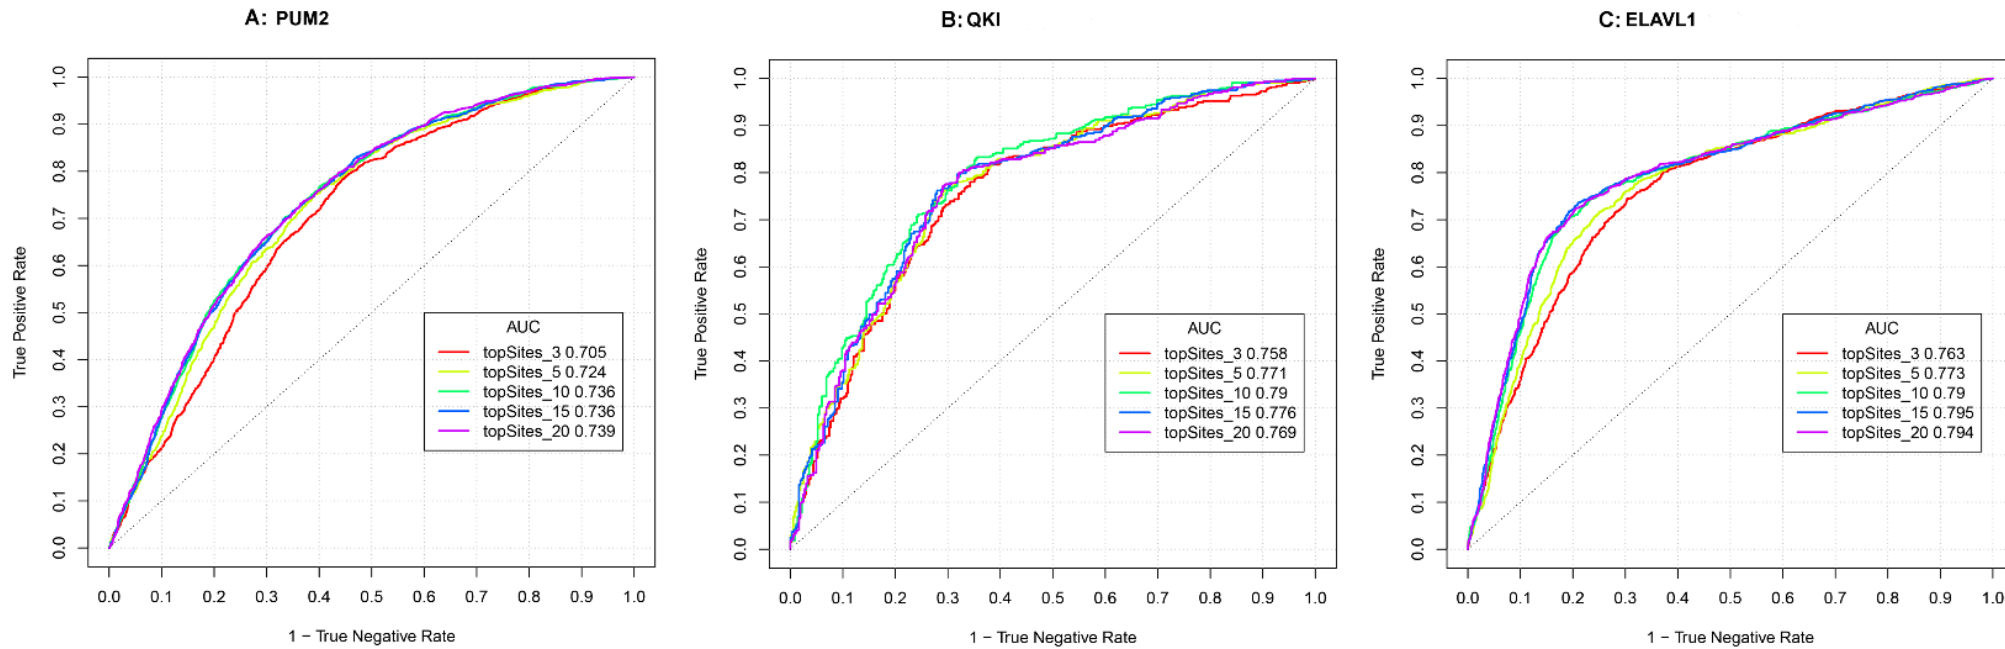

**Note:** The evaluation datasets, for PUM2, QKI, and ELAVL1, respectively, were compiled by authors of Oli (Livi and Blanzieri, 2014). Five different numbers of best matching sites were tested, i.e., 3, 5, 10, 15, and 20.

The positive, negative training set, and PWM for PUM2, QKI and ELAVL1 could be downloaded from <http://bioinfo.vanderbilt.edu/beRBP/download/FigS1.7z>.

Figure S2. Venn diagram showing the number of common RBPs with PWM available in cisBP-RNA, covered by DeepBind models, and having binding targets in AURA, eCLIP, or DoRiNA.

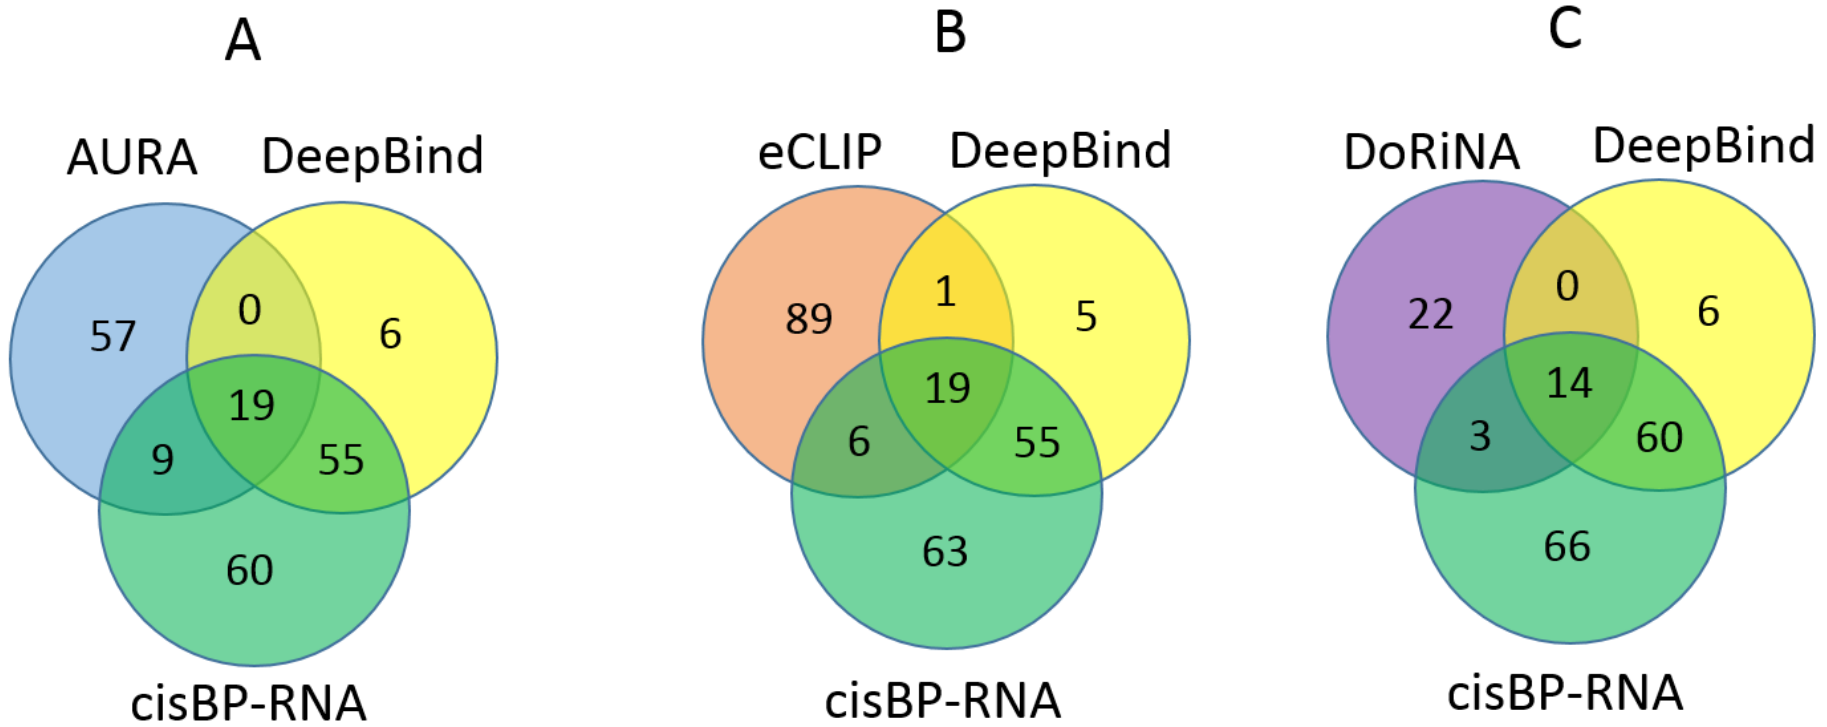

**Note:** whereas sub-figure A indicates a total of 28 RBPs overlap between AURA and cisBP-RNA, our Specific models encompassed 29 RBPs; whereas sub-figure B indicates a total of 25 shared RBPs between eCLIP and cisBP-RNA, our whole-transcriptome scan included 26 RBPs. The one additional RBP, PUM2, whose PWM was obtained from a published paper (PubMed ID: 23863844) but not from cisBP-RNA.



Figure S3. RBP target prediction accuracy (AUPRC) across 37 AURA benchmark datasets.

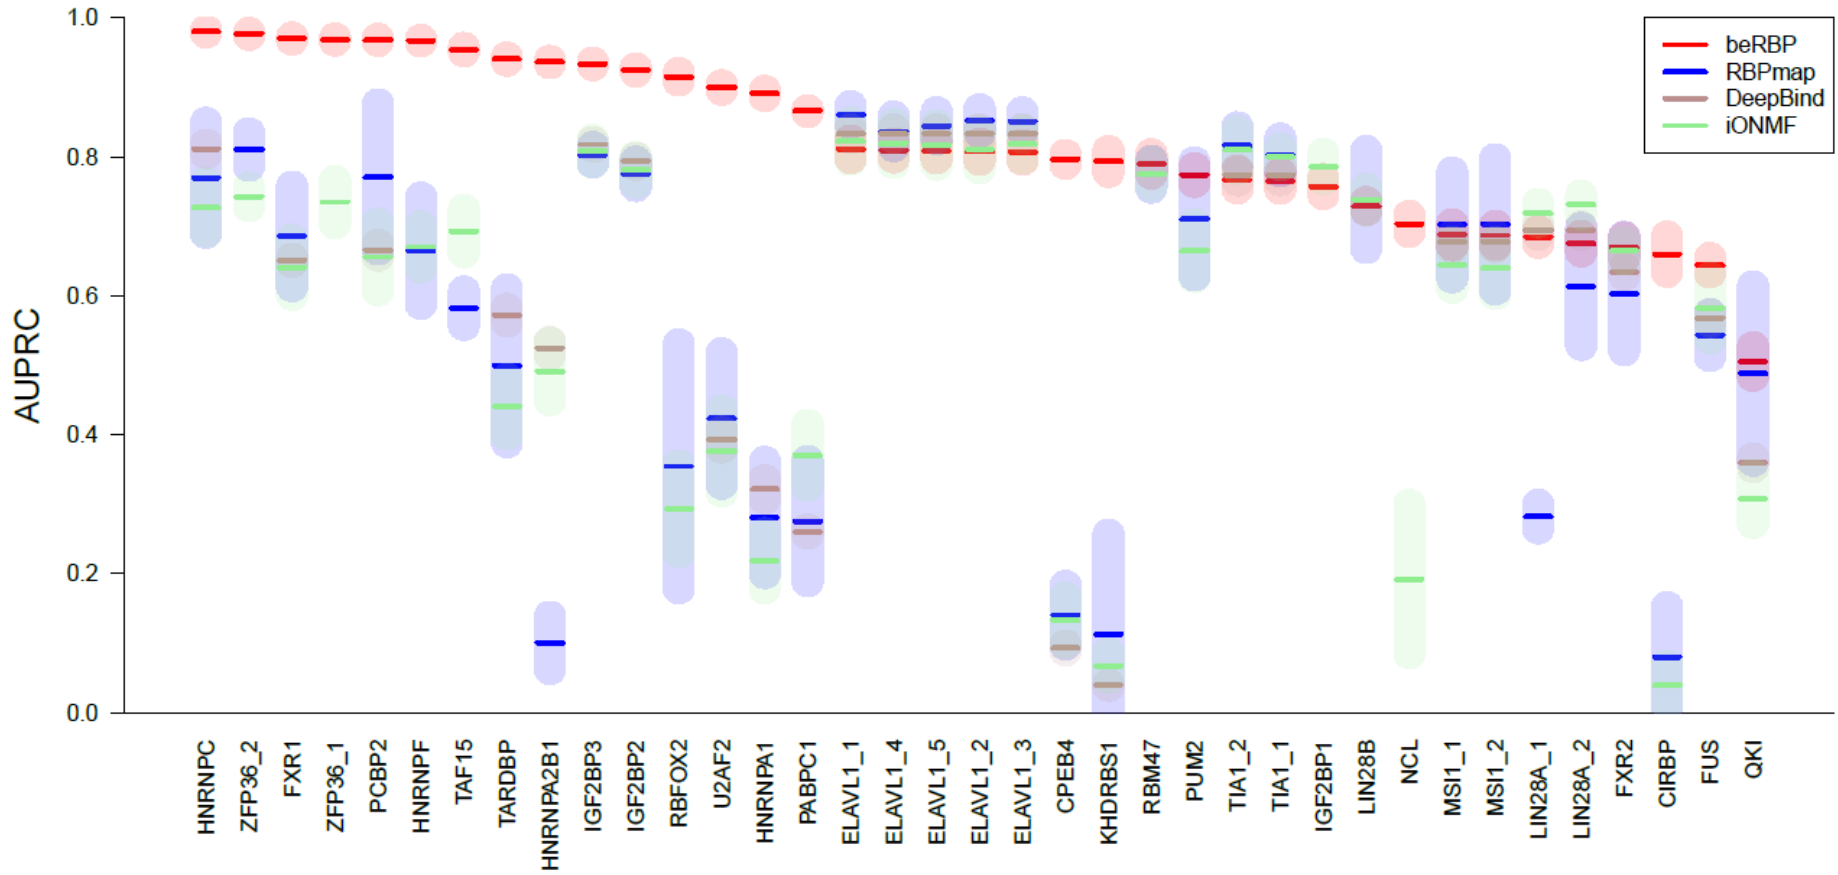

Figure S4. AUCs and AUPRCs are correlated across 37 beRBP Specific models.

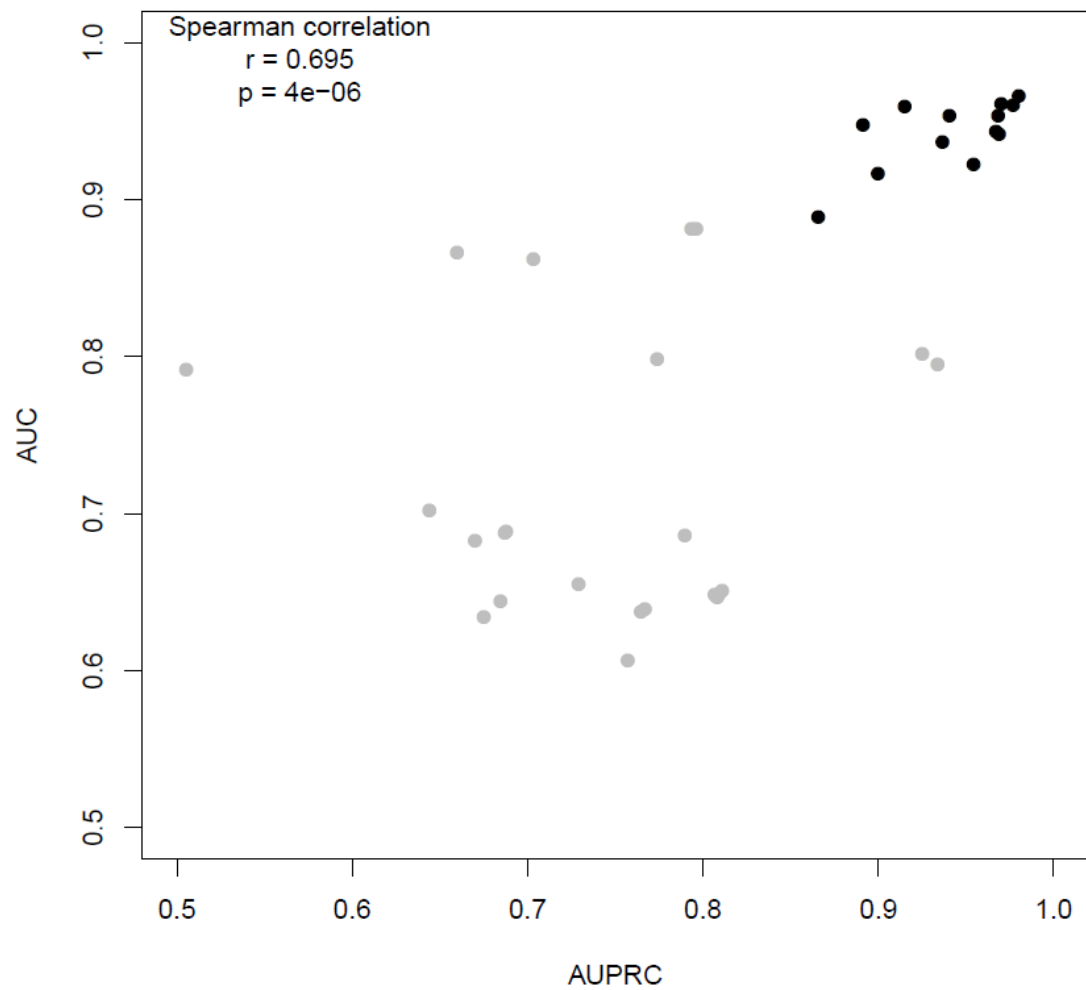

**Note:** dark points indicate the 13 more robust models with joint highest AUC and AUPRC.

Figure S5. Cross-prediction performance was independent of motif similarity.

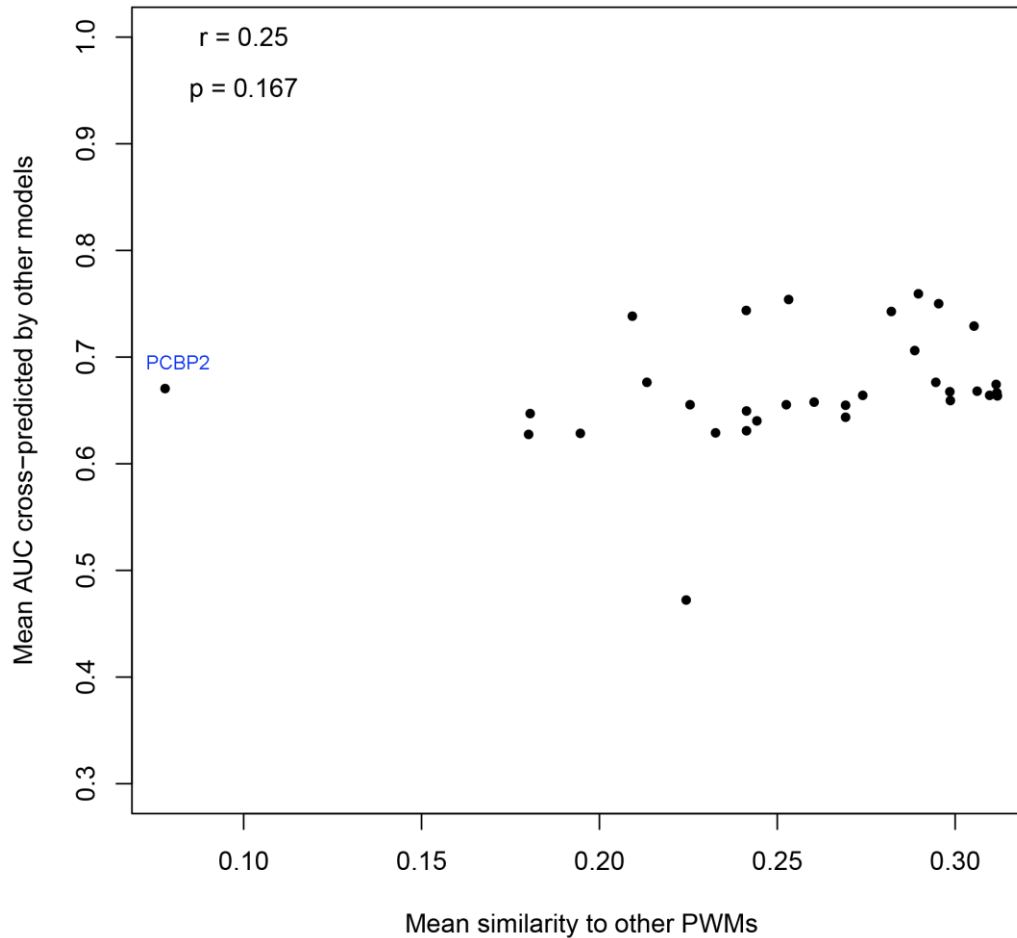

**Note:** X-axis is the mean similarity to other PWMs, that is, for each RBP:PWM, we calculated its average motif similarity to the other PWMs. We employed the function 'motifSimilarity' from R package PWMEnrich to calculate the similarity value between two motif matrices (PWMs). Note that we revised the function 'motifSimilarity' not to allow reverse complement similarity calculation since we only consider the motif search on the RNA sequence. Y-axis is the mean cross-prediction performance, that is, for the model trained by each RBP:PWM, we averaged its cross-prediction performance on other RBPs. We included 33 of all 37 Specific models, excluding CIRBP, CPEB4, KHDRBS1, and NCL with few targets.

Figure S6. Negative correlation between AUC and positive dataset size of beRBP Specific models.

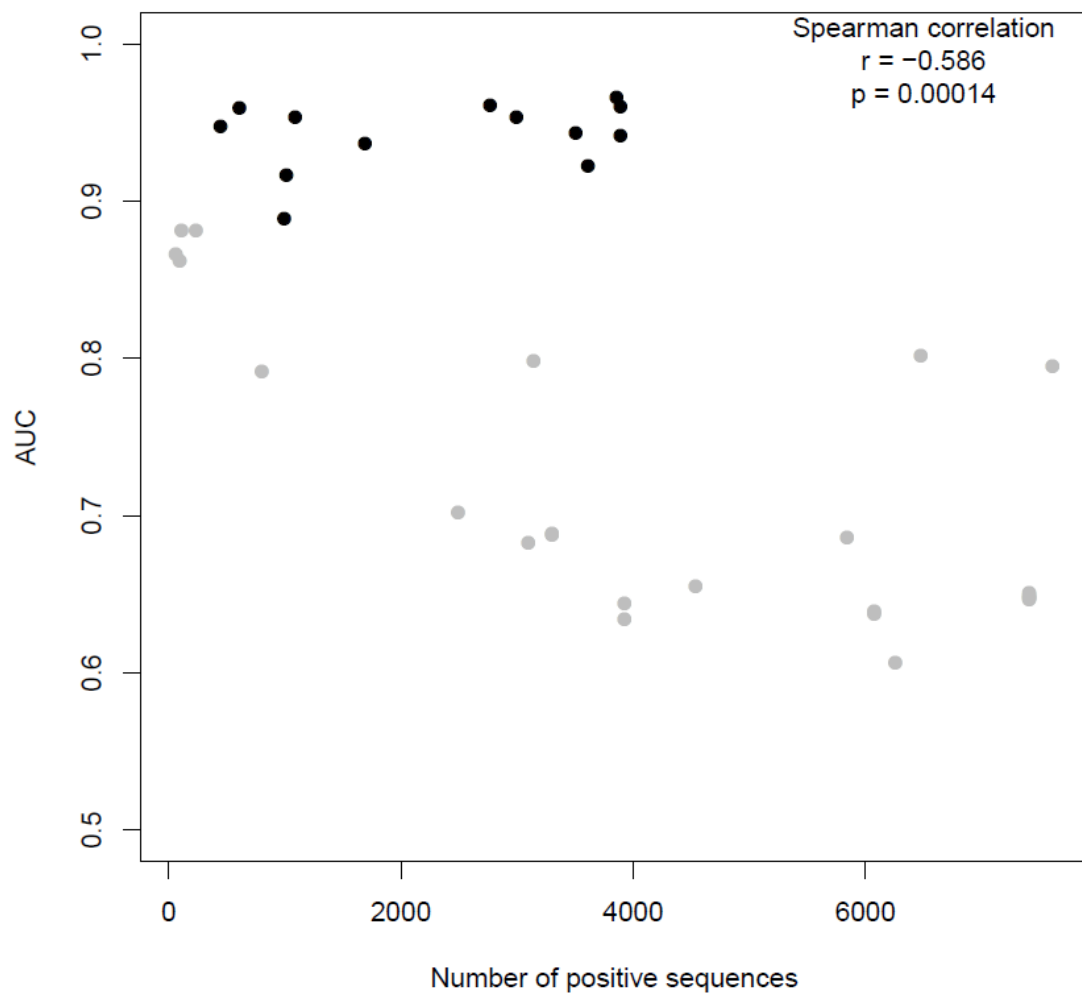

**Note:** dark points indicate the 13 more robust models with joint highest AUC and AUPRC.
